# Supplementary material
Source: Frontiers journal article supplement (https://www.frontiersin.org/articles/475955)
Supplement: Data_Sheet_1.pdf [file Data_Sheet_1.pdf]

## Supplementary Material

### 1 Supplementary Figures and Tables

#### 1.1 Supplementary Figures

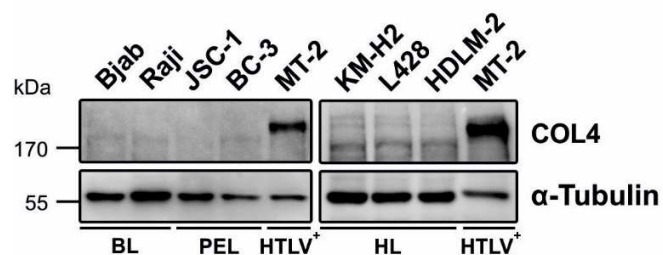

**Supplementary Figure 1. COL4 protein is upregulated in HTLV-1 positive T-cells only.** Immunoblotting shows COL4 protein expression in cell lines established from Burkitt lymphoma (BL; Bjab, Raji), Primary Effusion Lymphoma (PEL; JSC-1, BC-3) and Hodgkin Lymphoma (HL; KM-H2, L428, HDLM-2). Staining of COL4 protein in the HTLV-1 positive T-cell line MT-2 served as positive control, staining of  $\alpha$ -Tubulin as loading control.

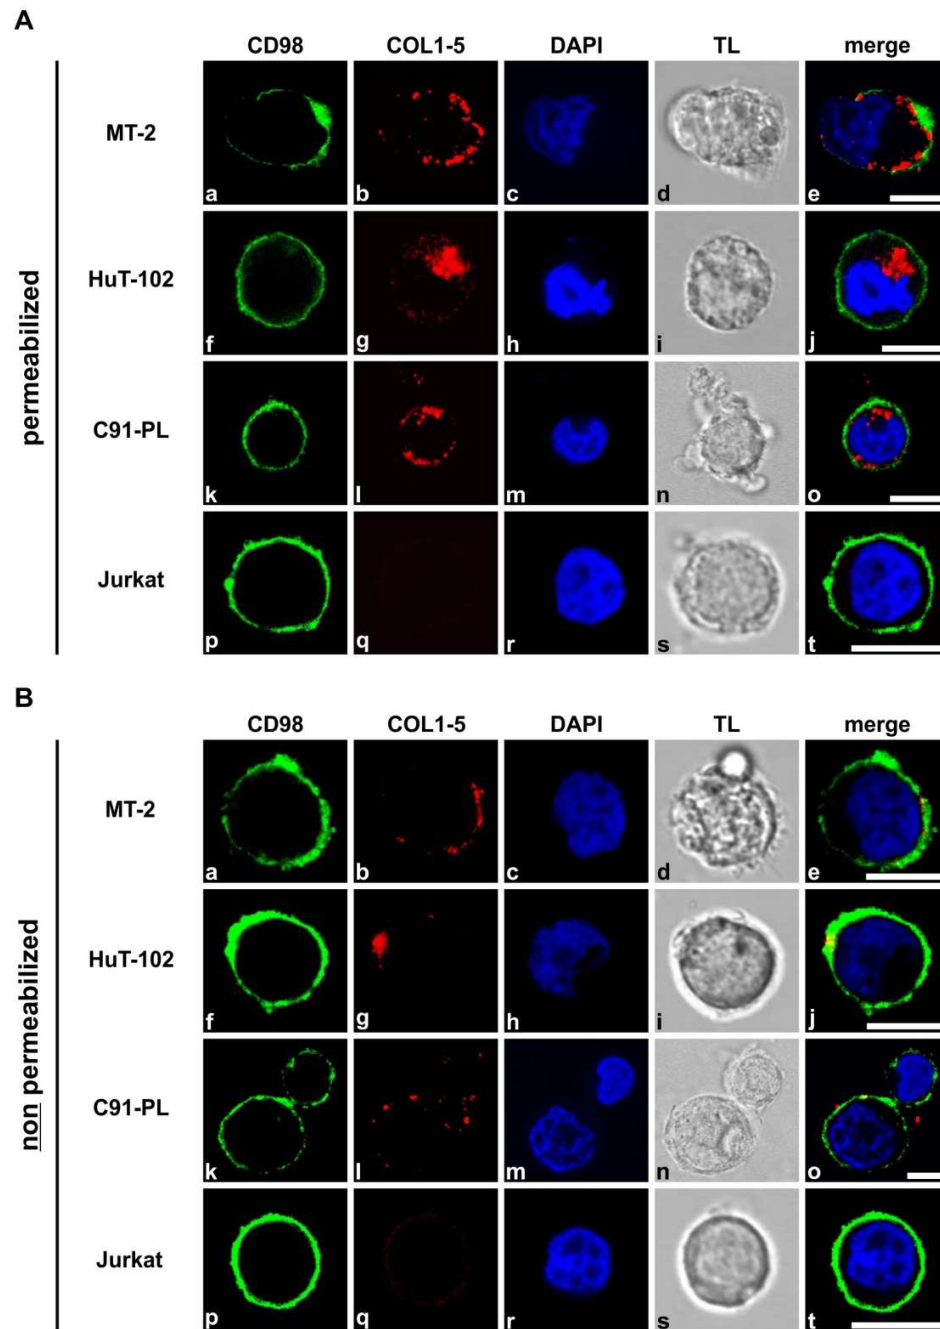

**Supplementary Figure 2. COL1-5 protein localizes to extra- and intracellular compartments in HTLV-1 positive T-cells. (A, B)** Confocal microscopy was performed in the HTLV-1 positive T-cell lines MT-2, HuT-102 and C91-PL and in the HTLV-1 negative T-cell line Jurkat. Cells were spotted on epoxy-resin coated coverslips and fixed, washed with PBS containing 0.1 % Tween<sup>®</sup>-20 and (A) were permeabilized by 0.2 % Triton<sup>™</sup> X-100 for 20 min at 4 °C or (B) were left unpermeabilized by incubation with PBS for 20 min at 4 °C. Cells were washed twice and unspecific binding sites were blocked with PBS comprising 5 % FCS and 1 % BSA for 1 h at room temperature. Primary antibodies recognizing the plasma membrane marker CD98 (ab2528, abcam) or COL1-5 (2150-2206, BioRad) were applied for 45 min at 37 °C. Cells were washed three times and incubated with secondary

antibodies Alexa Fluor® 488 anti-mouse (CD98 in green) or Alexa Fluor® 647 anti-rabbit (COL1-5 in red) for 45 min at 37 °C one after the other with three washing steps in between. After three final washing steps, cells were fixed with *ProLong® Gold Antifade Mountant medium with DAPI* (Life Technologies) to stain the nuclei (blue). Images were acquired using a *Leica TCS SP5* confocal laser scanning microscope equipped with a 63x1.4 HCX PL APO CS oil immersion objective lens (Leica Microsystems). Images of transmitted light (TL) served as control. The scale bars represent 10µm.

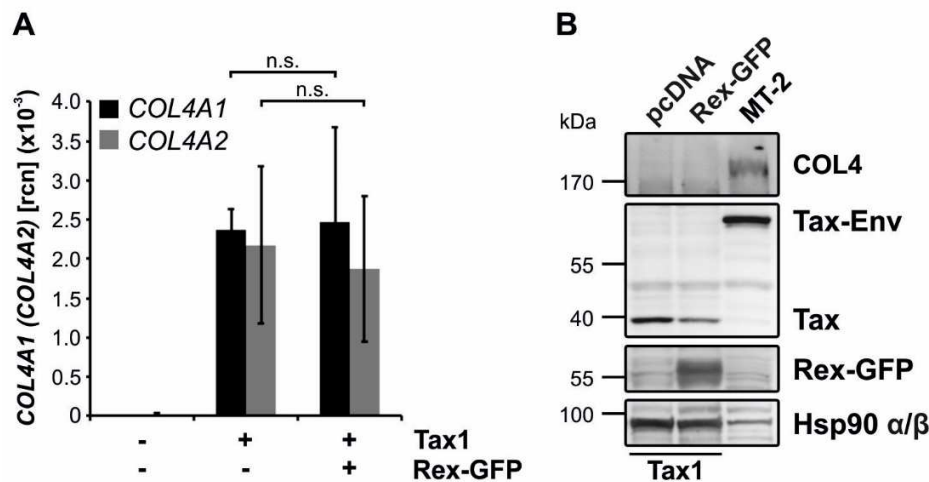

**Supplementary Figure 3. Rex does not cooperate with Tax in regulating COL4 expression.** (A, B) 10\*10<sup>6</sup> Jurkat T-cells were co-transfected with a Tax expression vector (pEFneo-Tax1; 60 µg DNA) together with a mock (pcDNA) or Rex-GFP fusion protein expression vector (pCMV-Rex1-GFP; 40 µg). (A) *COL4A1* and *COL4A2* transcript levels were quantified by qPCR in untreated or Tax and Rex-GFP transfected Jurkat T-cells. The mean relative copy numbers (rcn), normalized on *ACTB*, of three independent experiments ± SD are depicted. Student's t-test was conducted for statistical analysis (n.s., not significant). (B) Western Blot analysis was carried out staining COL4, Tax, Rex-GFP protein (using GFP-specific antibodies), and Hsp90 α/β as loading control. Detection of COL4 and Tax protein in the HTLV-1 positive T-cell line MT-2 served as positive control.

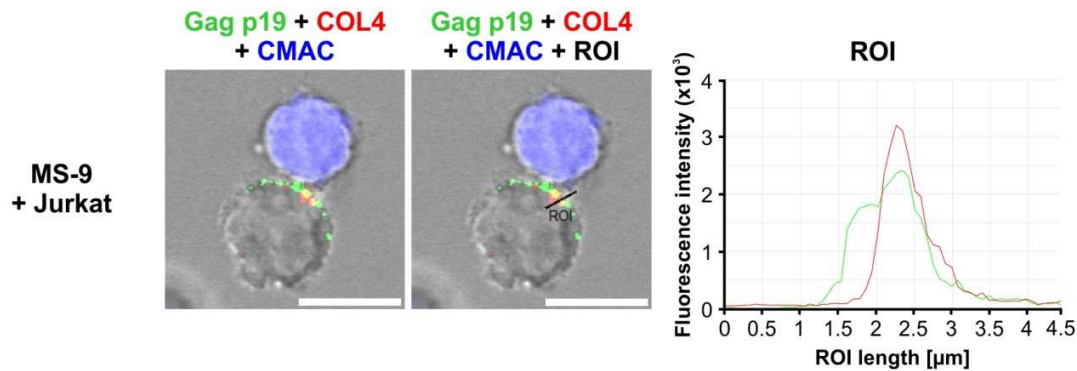

**Supplementary Figure 4. COL4 and Gag p19 partially co-localize and accumulate at the virological synapse.** HTLV-1 negative Jurkat T-cells were prestained with the cell-permeable dye *CellTracker™ Blue 7-Amino-4-Chlormethylcumarin* (CMAC; Thermo Fisher Scientific; 45 min, 20 μM, 37 °C; blue). Pre-stained Jurkat and HTLV-1 positive MS-9 cells were co-cultured for 30 min at 37 °C at a ratio of 1:1 on poly-L-lysine coated coverslips. Cells were fixed in 2 % PFA for 1 h at room temperature and after five washing steps with PBS containing 0.1 % Tween®-20, cells were permeabilized by 0.2 % Triton™ X-100 for 20 min at 4 °C. Cells were washed twice and unspecific binding sites were blocked with PBS comprising 5 % FCS and 1 % BSA for 1 h at room temperature. Primary antibodies recognizing Gag p19 (mouse; TP-7, Zeptometrix) or COL4 (rabbit; ab6586, abcam) were applied for 45 min at 37 °C, followed by three washing steps. Cells were incubated with secondary antibodies Alexa Fluor® 488 anti-mouse (Gag p19 in green) and Alexa Fluor® 647 anti-rabbit (COL4 in red) for 45 min at 37 °C one after the other with three washing steps in between. After three final washing steps, cells were fixed with *ProLong® Gold Antifade Mountant medium without DAPI* (Life Technologies). Images were acquired using a *Leica TCS SP5* confocal laser scanning microscope equipped with a 63x1.4 HCX PL APO CS oil immersion objective lens (Leica Microsystems). A merge of CMAC (blue), Gag p19 (green) and COL4 (red) stain together with transmitted light is depicted. Images were analyzed using the LAS AF software (Leica Microsystems): A region of interest (ROI) was defined showing the corresponding signals of Gag p19 and COL4 fluorescence intensities. The scale bars represent 10 μm.

## 1.2 Supplementary Tables

Supplementary Table 1.

Transcriptional expression of components of the viral biofilm.

| Gene   | average signals <sup>a</sup> |      |                  |          | fold change <sup>b</sup>    |         |                     |         | probe set    |
|--------|------------------------------|------|------------------|----------|-----------------------------|---------|---------------------|---------|--------------|
|        | Tax-positive                 |      | Tax-negative     |          | MT-2 vs<br>CD4 <sup>+</sup> | p value | Tesi vs<br>Tesi/Tet | p value |              |
|        | MT-2                         | Tesi | CD4 <sup>+</sup> | Tesi/Tet |                             |         |                     |         |              |
| AGRIN  | 68                           | 150  | 65               | 122      | 1                           | 0.79    | 1                   | 0.13    | 212285_s_at  |
| AGRIN  | 51                           | 90   | 52               | 54       | -1                          | 0.97    | 2                   | 0.41    | 217419_x_at  |
| AGRIN  | (5)                          | (6)  | (6)              | (9)      | n.a.                        |         | n.a.                |         | 217410_at    |
| AGRIN  | (8)                          | (8)  | (11)             | 23       | -1                          | 0.82    | -3                  | 0.04    | 212283_at    |
| BST2   | 65                           | 59   | 29               | 73       | 2                           | 0.09    | -1                  | 0.02    | 1570198_x_at |
| BST2   | 39                           | 49   | (11)             | 32       | 4                           | 0.12    | 2                   | 0.09    | 1570197_at   |
| BST2   | 468                          | 730  | 516              | 650      | -1                          | 0.29    | 1                   | 0.51    | 201641_at    |
| COL1A1 | 263                          | 161  | (2)              | 65       | 272                         | 0.06    | 2                   | 0.17    | 1556499_s_at |
| COL1A1 | 108                          | 53   | (4)              | 28       | 38                          | 0.04    | 2                   | 0.27    | 202310_s_at  |
| COL1A1 | (12)                         | (4)  | (5)              | (17)     | n.a.                        |         | n.a.                |         | 202311_s_at  |
| COL1A1 | (9)                          | (15) | (12)             | (16)     | n.a.                        |         | n.a.                |         | 202312_s_at  |
| COL1A1 | 64                           | 46   | 41               | 51       | 2                           | 0.41    | -1                  | 0.89    | 217430_x_at  |
| COL1A2 | (2)                          | (2)  | (2)              | (2)      | n.a.                        |         | n.a.                |         | 229218_at    |
| COL1A2 | (4)                          | (8)  | (2)              | (1)      | n.a.                        |         | n.a.                |         | 202404_s_at  |
| COL1A2 | (3)                          | (13) | (18)             | (17)     | n.a.                        |         | n.a.                |         | 202403_s_at  |
| COL2A1 | (5)                          | (13) | (10)             | (11)     | n.a.                        |         | n.a.                |         | 213492_at    |
| COL2A1 | (4)                          | (5)  | (1)              | (2)      | n.a.                        |         | n.a.                |         | 217404_s_at  |
| COL3A1 | (11)                         | 1604 | (5)              | 1614     | n.a.                        |         | -1                  | 0.99    | 215076_s_at  |
| COL3A1 | (6)                          | 986  | (3)              | 992      | n.a.                        |         | -1                  | 0.93    | 201852_x_at  |
| COL3A1 | (7)                          | 492  | (3)              | 449      | n.a.                        |         | 1                   | 0.51    | 211161_s_at  |
| COL3A1 | (1)                          | 57   | (3)              | 70       | n.a.                        |         | -1                  | 0.14    | 232458_at    |
| COL4A1 | (7)                          | (13) | (2)              | 24       | n.a.                        |         | -2                  | 0.48    | 233652_at    |
| COL4A1 | 1780                         | 360  | (16)             | 92       | 109                         | <0.01   | 4                   | <0.01   | 211980_at    |
| COL4A1 | 855                          | 128  | (4)              | 40       | 267                         | 0.02    | 3                   | <0.01   | 211981_at    |
| COL4A2 | 1325                         | 624  | (4)              | 233      | 331                         | <0.01   | 3                   | 0.06    | 211964_at    |
| COL4A2 | 604                          | 205  | (8)              | 65       | 87                          | 0.02    | 3                   | 0.03    | 211966_at    |
| COL4A2 | 33                           | (15) | (4)              | (5)      | 10                          | 0.03    | n.a.                |         | 237624_at    |

Supplementary Table 1. continued

| Gene   | average signals <sup>a</sup> |      |                  |          | fold change <sup>b</sup>    |         |                     |         | probe set    |
|--------|------------------------------|------|------------------|----------|-----------------------------|---------|---------------------|---------|--------------|
|        | Tax-positive                 |      | Tax-negative     |          | MT-2 vs<br>CD4 <sup>+</sup> | p value | Tesi vs<br>Tesi/Tet | p value |              |
|        | MT-2                         | Tesi | CD4 <sup>+</sup> | Tesi/Tet |                             |         |                     |         |              |
| COL4A3 | (5)                          | (14) | (14)             | (11)     | n.a.                        |         | n.a.                |         | 216898_s_at  |
| COL4A3 | (1)                          | (7)  | (1)              | (7)      | n.a.                        |         | n.a.                |         | 216896_at    |
| COL4A3 | (9)                          | (12) | (9)              | (8)      | n.a.                        |         | n.a.                |         | 216368_s_at  |
| COL4A3 | (3)                          | (7)  | (2)              | (11)     | n.a.                        |         | n.a.                |         | 216367_at    |
| COL4A4 | (1)                          | (1)  | (1)              | (1)      | n.a.                        |         | n.a.                |         | 214602_at    |
| COL4A4 | (10)                         | (3)  | (1)              | (4)      | n.a.                        |         | n.a.                |         | 229779_at    |
| COL4A4 | (4)                          | (9)  | (9)              | (15)     | n.a.                        |         | n.a.                |         | 241565_at    |
| COL4A5 | (2)                          | 13   | (1)              | (14)     | n.a.                        |         | -1                  | 0.72    | 234387_at    |
| COL4A5 | (7)                          | (1)  | (6)              | (6)      | n.a.                        |         | n.a.                |         | 213110_s_at  |
| COL4A5 | (8)                          | (9)  | (6)              | (8)      | n.a.                        |         | n.a.                |         | 1563536_at   |
| COL4A6 | (14)                         | (16) | (2)              | 21       | n.a.                        |         | -1                  | 0.26    | 1564654_at   |
| COL4A6 | (7)                          | (3)  | (7)              | (6)      | n.a.                        |         | n.a.                |         | 210945_at    |
| COL4A6 | (7)                          | (10) | (6)              | (7)      | n.a.                        |         | n.a.                |         | 213992_at    |
| COL4A6 | (6)                          | (5)  | (3)              | (2)      | n.a.                        |         | n.a.                |         | 211473_s_at  |
| COL5A1 | (4)                          | (2)  | (4)              | (8)      | n.a.                        |         | n.a.                |         | 212489_at    |
| COL5A1 | (5)                          | (18) | (11)             | 24       | n.a.                        |         | n.a.                |         | 1556138_a_at |
| COL5A1 | (2)                          | (2)  | (4)              | (2)      | n.a.                        |         | n.a.                |         | 212488_at    |
| COL5A1 | (5)                          | (4)  | (3)              | (5)      | n.a.                        |         | n.a.                |         | 203325_s_at  |
| COL5A2 | (8)                          | (4)  | (18)             | (8)      | n.a.                        |         | n.a.                |         | 221730_at    |
| COL5A2 | (11)                         | (6)  | (15)             | (8)      | n.a.                        |         | n.a.                |         | 221729_at    |
| COL5A3 | (12)                         | (4)  | (15)             | (4)      | n.a.                        |         | n.a.                |         | 52255_s_at   |
| COL5A3 | (2)                          | (3)  | (4)              | (2)      | n.a.                        |         | n.a.                |         | 218975_at    |
| FUT4   | (5)                          | (12) | (15)             | (12)     | n.a.                        |         | n.a.                |         | 244889_at    |
| FUT4   | (4)                          | (9)  | (7)              | (5)      | n.a.                        |         | n.a.                |         | 1560995_s_at |
| FUT4   | 148                          | 90   | 71               | 31       | 2                           | <0.01   | 3                   | 0.03    | 209892_at    |
| FUT4   | 98                           | 38   | 61               | 31       | 2                           | 0.32    | 1                   | 0.37    | 209893_s_at  |
| FUT9   | (2)                          | (1)  | (1)              | (1)      | n.a.                        |         | n.a.                |         | 207696_at    |
| FUT9   | (4)                          | (1)  | (2)              | (2)      | n.a.                        |         | n.a.                |         | 216185_at    |
| LGALS3 | (4)                          | 27   | (6)              | 27       | 1                           | 0.91    | 1                   | 0.95    | 1557197_a_at |
| LGALS3 | 2043                         | 4345 | 1014             | 4490     | 2                           | <0.01   | -1                  | 0.54    | 208949_s_at  |

<sup>a</sup> average signals were rounded to integers; values in brackets were deemed absent calls.

<sup>b</sup> values depicting the fold change of transcript expression were rounded to integers; p values were rounded on two decimals; vs, versus; n.a., not applicable.
